# Supplementary material for: Cage connectivities of C88 (33) and C92 (82) fullerenes captured as trifluoromethyl derivatives, C88(CF3)18 and C92(CF3)16
Source: Royal Society of Chemistry journal article supplement (doi:10.1039/b912839e), 2009-01-01
Supplement: b912839e.pdf [file b912839e.pdf]

## Supporting Information

Chemical Communication b912839e

### Cage connectivities of C<sub>88</sub> (33) and C<sub>92</sub> (82) fullerenes captured as trifluoromethyl derivatives, C<sub>88</sub>(CF<sub>3</sub>)<sub>18</sub> and C<sub>92</sub>(CF<sub>3</sub>)<sub>16</sub>

S. I. Troyanov and N. B. Tamm

The sublimed C<sub>m</sub>(CF<sub>3</sub>)<sub>n</sub> mixture was dissolved in hexane and subjected to HPLC separation with the use of a WATERS 1500 chromatographic system, a Cosmosil Buckyprep column (10×250 mm, Nacalai Tesque Corp.) and hexane as the eluent, monitored at 290 nm. A chromatogram of the mixture is presented in Figure S1. The positions of fractions 15 and 34 eluted at 6.83 and 37.2 min, respectively, are shown. Fraction 15 contained three main components, C<sub>82</sub>(CF<sub>3</sub>)<sub>14</sub>, C<sub>86</sub>(CF<sub>3</sub>)<sub>16</sub>, and C<sub>92</sub>(CF<sub>3</sub>)<sub>16</sub>, whereas fraction 34 contained C<sub>88</sub>(CF<sub>3</sub>)<sub>18</sub> as the main component according to MALDI MS analyses.

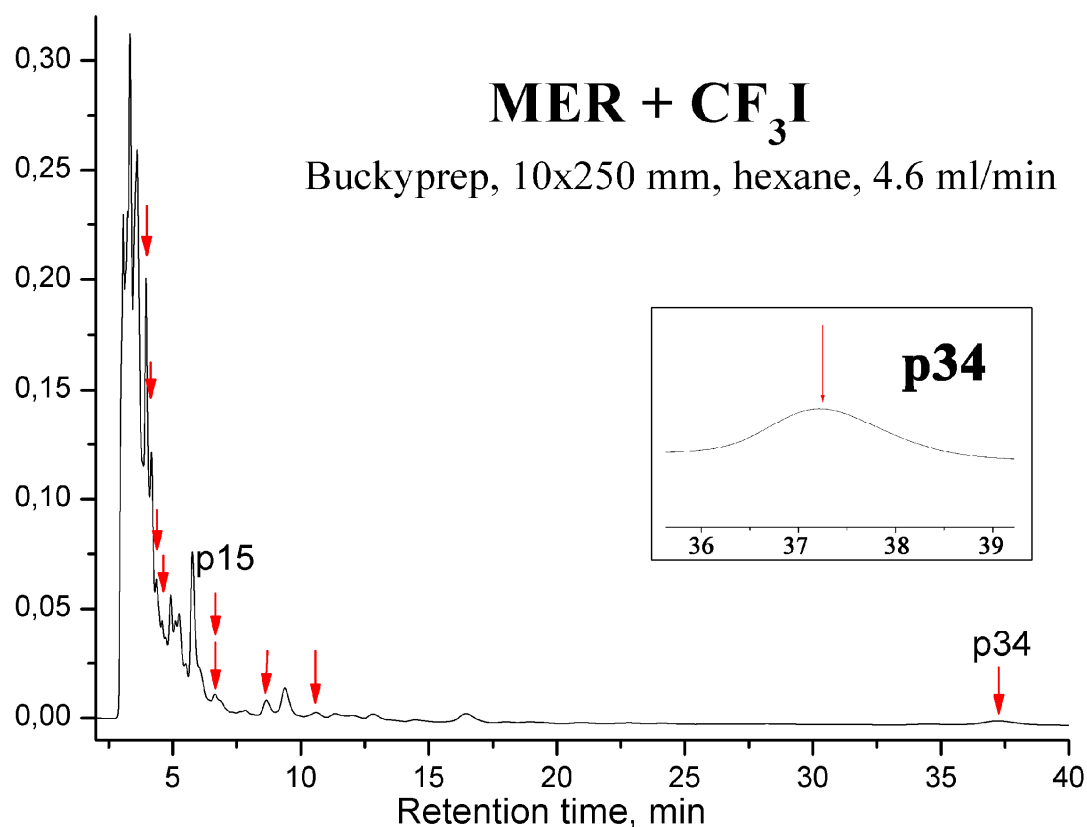

Fig. S1. HPLC trace of the mixture of trifluoromethylated higher fullerenes recorded in hexane. Red arrows denote the fractions which afforded crystalline materials. Crystals of C<sub>86</sub>(CF<sub>3</sub>)<sub>16</sub> [S1] and C<sub>92</sub>(CF<sub>3</sub>)<sub>16</sub> were obtained from fraction p15, whereas fraction p34 gave crystals of C<sub>88</sub>(CF<sub>3</sub>)<sub>18</sub>.

[S1] S. I. Troyanov and N. B. Tamm, *Crystallogr. Rep.* 2009, **54**, 598.
